# Supplementary material
Source: publisher figshare collection journal article supplement (https://wiley.figshare.com/ndownloader/files/9019735)
Supplement: Supplementary file 1 [file 9019735]

## Sheet: Hoja1
	Free RNA		G3BP		eIF4B
Nt position	Mean reactivity (n=11)	SD	Mean reactivity (n=9)	SD	Mean reactivity (n=6)	SD
30	0	0	0	0	0	0
31	0	0	0	0	0	0
32	0	0	0	0	0	0
33	0	0	0	0	0.102896	0.166125
34	0.0841045	0.273539	0.0904913	0.271474	0.085034	0.20829
35	0.0736446	0.24199	0.0932116	0.258452	0.0931867	0.196267
36	0.122011	0.296699	0.0994159	0.231357	0.0806188	0.171092
37	0.0595933	0.0671673	0.0389244	0.0393241	0.0145857	0.0170663
38	0.0616833	0.0621136	0.0368942	0.039089	0.0176403	0.0225618
39	0.0651682	0.0668869	0.0423053	0.0434568	0.0331975	0.033226
40	0.0777407	0.0760153	0.0415602	0.0426653	0.0313667	0.0258525
41	0	0	0	0	0	0
42	0	0	0	0	0	0
43	0	0	0	0	0	0
44	0	0	0	0	0	0
45	0	0	0	0	0	0
46	0	0	0	0	0	0
47	0	0	0	0	0	0
48	0	0	0	0	0	0
49	0	0	0	0	0	0
50	0	0	0	0	0	0
51	0.0436265	0.0750506	0.0298467	0.06008	0.0256686	0.0425183
52	0.21551	0.0826924	0.161229	0.0729146	0.0861033	0.0458403
53	0.400823	0.0576167	0.305252	0.0715477	0.174647	0.0457939
54	0.765502	0.0672953	0.562026	0.193024	0.284026	0.0835639
55	0.752459	0.0646487	0.570402	0.214764	0.293059	0.0690457
56	0.597403	0.142767	0.450258	0.165463	0.229646	0.0420989
57	0	0	0	0	0	0
58	0	0	0	0	0	0
59	0	0	0	0	0	0
60	0	0	0	0	0	0
61	0	0	0	0	0	0
62	0.107622	0.237726	0.0351318	0.0701746	0.111483	0.18513
63	0.162631	0.181171	0.127395	0.131072	0.145238	0.119491
64	1.08378	0.400353	1.1041	0.376183	1.32355	0.424683
65	1.40371	0.225878	1.06424	0.468617	0.550903	0.108721
66	1.30754	0.246415	0.871755	0.327992	0.537627	0.120887
67	0.857037	0.262004	0.579676	0.224221	0.296771	0.0660226
68	0	0	0	0	0	0
69	0	0	0	0	0	0
70	0.00320561	0.0106318	0.002002	0.00600601	0.0091638	0.0224466
71	0.00601052	0.0199346	0.00467134	0.014014	0.0106911	0.0261877
72	0.00681192	0.0225926	0.00266934	0.00800801	0.0091638	0.0224466
73	0.0100175	0.0332244	0.00734067	0.022022	0.0091638	0.0224466
74	0.0100175	0.0332244	0.012012	0.036036	0.015273	0.0374111
75	0.0244026	0.0193408	0.336427	0.254743	0.796645	0.418599
76	0	0	0	0	0	0
77	0	0	0	0	0	0
78	0	0	0	0	0	0
79	0	0	0	0	0	0
80	0	0	0	0	0	0
81	0	0	0	0	0	0
82	0.00448012	0.0148589	0	0	0.011953	0.0292787
83	0	0	0	0	0	0
84	0.0149337	0.0495296	0	0	0.000771159	0.00188895
85	0	0	0	0	0	0
86	0	0	0	0	0	0
87	0	0	0	0	0	0
88	0	0	0	0	0	0
89	0	0	0	0	0	0
90	0.0279221	0.0926071	0.0255628	0.0766885	0	0
91	0	0	0	0	0	0
92	0.0162338	0.0538413	0.0278867	0.0836601	0	0
93	0	0	0	0	0	0
94	0	0	0	0	0	0
95	0	0	0	0	0	0
96	0	0	0	0	0	0
97	0	0	0	0	0	0
98	0	0	0	0	0	0
99	0.0032844	0.00878931	0.0116195	0.0348584	0.123457	0.302406
100	0	0	0	0	0	0
101	0	0	0	0	0	0
102	0	0	0	0	0	0
103	0	0	0	0	0	0
104	0	0	0	0	0	0
105	0	0	0	0	0	0
106	0	0	0	0	0	0
107	0	0	0	0	0	0
108	0.0025974	0.00861461	0.00697168	0.020915	0	0
109	0	0	0	0	0	0
110	0	0	0	0	0	0
111	0	0	0	0	0	0
112	0	0	0	0	0	0
113	0	0	0	0	0	0
114	0	0	0	0	0	0
115	0	0	0	0	0	0
116	0	0	0	0	0	0
117	0	0	0	0	0	0
118	0.00714286	0.0236902	0.00697168	0.020915	0	0
119	0.0213485	0.070805	0	0	0.0262664	0.0643393
120	0.0144928	0.048067	0	0	0.0220923	0.0541148
121	0.00324675	0.0107683	0.00580973	0.0174292	0	0
122	0.0118577	0.0393276	0	0	0.0181936	0.0445651
123	0	0	0	0	0	0
124	0	0	0.0174292	0.0522876	0	0
125	0	0	0	0	0	0
126	0.00263396	0.00587486	0.0347493	0.0689564	0.0917813	0.142329
127	0	0	0	0	0	0
128	0	0	0	0	0.0742033	0.118056
129	0.0012987	0.0043073	0.00697168	0.020915	0	0
130	0	0	0	0	0	0
131	0	0	0	0	0	0
132	0.0766355	0.170504	0	0	0.0833489	0.1381
133	0	0	0	0	0	0
134	0	0	0	0	0	0
135	0	0	0	0	0	0
136	0.0298701	0.099068	0.0453159	0.135948	0	0
137	0.0805881	0.179532	0	0	0.0522086	0.0810587
138	0	0	0	0	0	0
139	0	0	0	0	0	0
140	0	0	0	0	0	0
141	0	0	0	0	0	0
142	0	0	0	0	0	0
143	0.927085	0.0987188	1.01795	0.151166	1.24872	0.281608
144	1.33552	0.363295	1.56614	0.0985634	1.30689	0.352667
145	0	0	0	0	0	0
146	0	0	0	0	0	0
147	0.888288	0.194917	0.993236	0.10087	0.864155	0.246905
148	0	0	0	0	0	0
149	0.0474026	0.157217	0.0720407	0.216122	0.129955	0.318322
150	0	0	0	0	0	0
151	0	0	0	0	0	0
152	0	0	0	0	0	0
153	0	0	0	0	0	0
154	0	0	0	0	0	0
155	0	0	0	0	0	0
156	0	0	0	0	0	0
157	0.123674	0.156355	0.120286	0.118386	0.120116	0.13959
158	0	0	0	0	0	0
159	0	0	0	0	0.0194932	0.0477483
160	0	0	0	0	0	0
161	0	0	0	0	0	0
162	0	0	0	0	0	0
163	0.057873	0.131296	0	0	0.0699633	0.109338
164	0	0	0	0	0	0
165	0.178393	0.116354	0.19542	0.119951	0.12272	0.160196
166	0.546675	0.134092	0.563185	0.101509	0.421486	0.178531
167	0.69176	0.134636	0.728283	0.0952446	0.543025	0.176325
168	0.716544	0.177821	0.773874	0.133374	0.620406	0.203818
169	0.756079	0.159507	0.869347	0.100526	0.830629	0.326733
170	0.305303	0.163292	0.338457	0.140475	0.403109	0.281862
171	0.198803	0.104819	0.226518	0.0939199	0.231562	0.143051
172	0	0	0	0	0.0441845	0.10823
173	0	0	0	0	0	0
174	0	0	0	0	0	0
175	0.00395257	0.0131092	0	0	0.00389864	0.00954967
176	0	0	0	0	0	0
177	0	0	0	0	0	0
178	0	0	0	0	0	0
179	1.23343	0.322953	1.28149	0.136431	1.0692	0.384624
180	1.09368	0.27123	1.16111	0.0865431	0.753883	0.232457
181	0.582572	0.18906	0.677375	0.0700538	0.406029	0.135561
182	0	0	0	0	0	0
183	0	0	0	0	0	0
184	0	0	0	0	0	0
185	0	0	0	0	0	0
186	0.0646722	0.0702052	0.101669	0.0964929	0.0551695	0.0750999
187	0	0	0	0	0	0
188	0	0	0	0	0	0
189	0	0	0	0	0	0
190	0.000590798	0.00195946	0.000618456	0.00123745	0	0
191	0	0	0	0	0	0
192	0.0184357	0.0301436	0.0281402	0.0348097	0.0619482	0.0626993
193	0.0768469	0.171548	0	0	0	0
194	0	0	0	0	0	0
195	0	0	0	0	0	0
196	0.0782779	0.259618	0	0	0	0
197	0.00712516	0.0134775	0.0106937	0.0198138	0	0
198	0.13942	0.0417277	0.220088	0.0844905	0.276526	0.0796487
199	0.605963	0.0985854	0.623948	0.0609193	0.517707	0.159408
200	0.206603	0.0441983	0.204361	0.044352	0.154341	0.0652265
201	0.196118	0.0454402	0.189668	0.0566776	0.173786	0.064502
202	0.184309	0.0484058	0.176894	0.0461543	0.166996	0.0369046
203	0	0	0	0	0	0
204	0	0	0	0	0	0
205	0.00527009	0.0174789	0.00464779	0.0139434	0.00779727	0.0190993
206	0.0306753	0.031741	0.0433292	0.0285394	0.0275779	0.0352752
207	0.51749	0.044666	0.481493	0.0793157	0.432272	0.0918489
208	0.347148	0.0537736	0.352098	0.0348056	0.247897	0.0786497
209	0	0	0	0	0	0
210	0	0	0	0	0	0
211	0	0	0	0	0	0
212	0.891634	0.193446	0.953986	0.154386	0.767477	0.199358
213	0.23629	0.129205	0.446885	0.128012	0.692032	0.142012
214	0.902282	0.269292	0.970973	0.222121	0.788356	0.376689
215	0.5618	0.287056	0.520286	0.287188	0.418465	0.460642
216	0	0	0	0	0	0
217	0	0	0	0	0	0
218	0	0	0	0	0	0
219	0	0	0	0	0	0
220	0	0	0	0	0	0
221	0	0	0	0	0	0
222	0	0	0	0	0	0
223	0	0	0	0	0	0
224	0	0	0	0	0	0
225	0	0	0	0	0	0
226	0	0	0	0	0	0
227	0	0	0	0	0	0
228	0.124	0.109002	0.109667	0.0966416	0.0960642	0.0667892
229	0.402645	0.234498	0.259054	0.139275	0.332215	0.0445298
230	0.294426	0.224233	0.169951	0.0898952	0.203703	0.0779885
231	0.0364429	0.0261671	0.0276482	0.0186718	0.0177145	0.0210058
232	0.0544261	0.0456812	0.0847559	0.0853217	0.122382	0.0705291
233	1.10827	0.128969	1.04699	0.17622	0.828859	0.137598
234	0.383841	0.13354	0.271661	0.0862788	0.244492	0.0371909
235	0.127986	0.0758807	0.0716022	0.0357127	0.106078	0.0401386
236	0.087809	0.0421242	0.0908838	0.0377547	0.0986505	0.0613549
237	0.11926	0.0733686	0.120635	0.0862769	0.156009	0.093348
238	0	0	0	0	0	0
239	0.540693	0.12744	0.513395	0.080818	0.385135	0.102111
240	0.0624551	0.200487	0.0105684	0.0296524	0.0369014	0.0493507
241	0.00263505	0.00873946	0	0	0.00649773	0.0159161
242	0.00395257	0.0131092	0	0	0.0116959	0.028649
243	0.00658762	0.0218486	0	0	0.0129955	0.0318322
244	0.0210804	0.0699157	0	0	0.00779727	0.0190993
245	0.0184453	0.0611762	0	0	0.0155945	0.0381987
246	0.00527009	0.0174789	0	0	0.00779727	0.0190993
247	0.00658762	0.0218486	0	0	0.0116959	0.028649
248	0.0184453	0.0611762	0	0	0	0
249	0	0	0	0	0	0
250	0	0	0	0	0	0
251	0	0	0	0	0	0
252	0	0	0	0	0	0
253	0	0	0	0	0	0
254	0	0	0	0	0	0
255	0	0	0	0	0	0
256	0	0	0	0	0	0
257	0.0789149	0.175575	0	0	0.00795342	0.0194818
258	0	0	0	0	0	0
259	0	0	0	0	0	0
260	0	0	0	0	0	0
261	0	0	0	0	0	0
262	0	0	0	0	0	0
263	0	0	0	0	0	0
264	0	0	0	0	0	0
265	0	0	0	0	0	0
266	0	0	0	0	0	0
267	0	0	0	0	0	0
268	0.0205833	0.0367704	0.0186394	0.0332402	0	0
269	0.0302196	0.0528411	0.0350612	0.0559582	0	0
270	0.0341666	0.0593523	0.0416832	0.064092	0	0
271	0.0311389	0.0536515	0.0399489	0.0621857	0	0
272	0.0237715	0.0407197	0.0301895	0.0459924	0	0
273	0.0337316	0.111875	0.0637486	0.191246	0	0
274	0	0	0.00809307	0.0242792	0	0
275	0.204774	0.146813	0.38576	0.15926	0.437099	0.497846
276	0.233112	0.131439	0.371632	0.155674	0.489498	0.211637
277	0.0669897	0.0961018	0.0710885	0.109816	0	0
278	0.0656333	0.0951237	0.063666	0.0976203	0	0
279	0.105959	0.130276	0.0613232	0.0951951	0.296165	0.460167
280	0.0510131	0.0887099	0.0589863	0.0911697	0	0
281	0.0470032	0.0823125	0.0500963	0.0780607	0	0
282	0	0	0	0	0	0
283	0	0	0	0	0	0
284	0.0189437	0.0628291	0.0278526	0.0553035	0	0
285	0.0197828	0.0448143	0.00897868	0.026936	0	0
286	0.00692084	0.0178404	0	0	0.00876369	0.0214666
287	0.0125546	0.0279323	0	0	0.0190132	0.0425846
288	0	0	0	0	0	0
289	0.0203786	0.0360019	0.0136465	0.0252718	0	0
290	0.0255934	0.0382389	0.0469812	0.0741989	0	0
291	0.0097106	0.0322064	0.0439955	0.131987	0	0
292	0.00979224	0.0238903	0.0196344	0.0330658	0	0
293	0	0	0.0513373	0.0820931	0.332063	0.17544
294	0.0034847	0.00787862	0.0690127	0.0982458	0	0
295	0.0347187	0.0438579	0.257936	0.23949	0.64515	0.430524
296	0.0280525	0.0634762	0.145868	0.300306	0	0
297	0.0278263	0.0483182	0.103678	0.162577	0.818473	0.368431
298	0.00822921	0.0162513	0.0256281	0.0768842	0	0
299	0.00696325	0.0230945	0.0310234	0.0930703	0	0
300	0.552857	0.134417	0.571279	0.114496	0.51221	0.136914
301	0.722306	0.166389	0.722226	0.126852	0.634446	0.20865
302	0.681245	0.132074	0.681601	0.154658	0.559065	0.158213
303	0.590296	0.316244	0.564594	0.368306	0.32627	0.256638
304	0.408903	0.287375	0.39752	0.33636	0.248066	0.181904
305	0.191138	0.19362	0.168493	0.210741	0.0773561	0.120137
306	0	0	0	0	0	0
307	0	0	0	0	0	0
308	0.00717408	0.0159613	0	0	0.0135615	0.0214755
309	0	0	0.0179972	0.0424089	0.178075	0.282825
310	0.0292483	0.0417136	0.0282247	0.0602529	0	0
311	0.173332	0.0727651	0.175456	0.104292	0.137897	0.0517581
312	0.213823	0.101119	0.2103	0.104347	0.139529	0.0408707
313	0.0166049	0.0298392	0.0401168	0.080523	0	0
314	0.0133275	0.0228602	0.0183321	0.029768	0	0
315	0.0344791	0.0525331	0.0343244	0.0452639	0	0
316	0.0418796	0.0666164	0.0406866	0.0592136	0	0
317	0	0	0.00549218	0.0164766	0	0
318	0.00901455	0.0200671	0.00826817	0.017634	0.00535475	0.0131164
319	0.0347654	0.0438718	0.017351	0.0344925	0.0647204	0.0610648
320	0.00464217	0.0153963	0.00134885	0.00404654	0	0
321	0.00767777	0.0124714	0.00651989	0.0174654	0.13158	0.150127
322	0	0	0	0	0	0
323	0	0	0	0	0	0
324	0	0	0	0	0	0
325	0.0127476	0.0219241	0.00456845	0.0137053	0.0400789	0.040572
326	0.0442036	0.0375545	0.0318554	0.0334211	0.023	0.032381
327	0.0159438	0.0222452	0.0127307	0.0197435	0	0
328	0.0225189	0.0395811	0.0205758	0.0332928	0	0
329	0.00309478	0.0102642	0.00134885	0.00404654	0	0
330	0.105071	0.0631204	0.0951867	0.0568628	0.0869257	0.0142621
331	0	0	0	0	0	0
332	0.00823008	0.018312	0.0104357	0.0209129	0.0195645	0.03151
333	0	0	0	0	0	0
334	0	0	0	0	0	0
335	0	0	0	0	0	0
336	0	0	0	0	0	0
337	0.0254575	0.039083	0.0389251	0.0530931	0	0
338	0.168088	0.0691468	0.192914	0.0523502	0.12954	0.0701892
339	0	0	0.00404654	0.0121396	0	0
340	0	0	0.00404654	0.0121396	0	0
341	0.000773694	0.00256605	0	0	0	0
342	0.2435	0.165681	0.155962	0.13816	0.12328	0.11073
343	0	0	0	0	0	0
344	0.00464217	0.0153963	0.00809307	0.0242792	0	0
345	0.00232108	0.00769816	0.00134885	0.00404654	0	0
346	0.00232108	0.00769816	0.00944192	0.0283257	0	0
347	0	0	0.00539538	0.0161861	0	0
348	0.00232108	0.00769816	0.00269769	0.00809307	0	0
349	0	0	0	0	0	0
350	0	0	0	0	0	0
351	0	0	0	0	0	0
352	0	0	0	0	0	0
353	0	0	0	0	0	0
354	0	0	0	0	0	0
355	0	0	0	0	0	0
356	0	0	0	0	0	0
357	0	0	0	0	0	0
358	0	0	0	0	0	0
359	0.114384	0.0821664	0.127934	0.0991355	0.0833707	0.0802506
360	0.413385	0.290545	0.347369	0.280434	0.226868	0.213535
361	1.06037	0.144846	0.963466	0.153827	0.620145	0.217159
362	0	0	0	0	0	0
363	0	0	0	0	0	0
364	0	0	0	0	0	0
365	0	0	0	0	0	0
366	0.0163547	0.0542424	0	0	0	0
367	0	0	0	0	0	0
368	0.180124	0.149456	0.146411	0.103989	0.231031	0.290559
369	0	0	0	0	0	0
370	0.0286267	0.094944	0.0310234	0.0930703	0	0
371	0	0	0	0	0	0
372	0	0	0	0	0	0
373	0.00766626	0.0254261	0.0215488	0.0646465	0	0
374	0.0131085	0.0369922	0.0265296	0.0394902	0.0982687	0.144164
375	0.0385843	0.0972994	0.0508397	0.119084	0.138882	0.218942
376	0.00785208	0.0174845	0.0136989	0.0275398	0.204366	0.316847
377	0.0194512	0.0392156	0.00833579	0.0201992	0.00803213	0.0196746
378	0.185611	0.146983	0.252884	0.130712	0.270059	0.279825
379	0.650426	0.250564	0.837075	0.169863	1.0107	0.42955
380	0	0	0	0	0	0
381	1.5434	0.1763	1.41289	0.302079	1.54478	0.346572
382	1.41768	0.132744	1.29298	0.256531	1.26457	0.364529
383	1.18624	0.120509	1.11745	0.292819	0.878517	0.207383
384	0.70193	0.0969369	0.559159	0.240821	0.489941	0.140055
385	0.110157	0.112122	0.106238	0.0888434	0.0418663	0.065757
386	0.00378911	0.00851756	0.00738875	0.00955019	0	0
387	0.025317	0.0475445	0.0290803	0.0412673	0	0
388	0.283995	0.286555	0.323108	0.254951	0.0648895	0.123456
389	1.12969	0.287022	1.04088	0.292337	0.816738	0.218637
390	0.00232108	0.00769816	0.00134885	0.00404654	0	0
391	0	0	0	0	0	0
392	0	0	0	0	0	0
393	0.00905706	0.0220785	0.000586725	0.00176018	0.0720724	0.11388
394	0	0	0	0	0	0
395	0	0	0	0	0	0
396	0	0	0	0	0	0
397	0	0	0	0	0	0
398	0.175646	0.118112	0.181961	0.095993	0.0971035	0.109866
399	0.100609	0.0783851	0.066749	0.0475158	0.0359596	0.0467314
400	0.102825	0.0998955	0.110452	0.0841537	0.0649458	0.0580924
401	0.224943	0.104921	0.201151	0.0871215	0.10203	0.107746
402	0.314142	0.120886	0.234149	0.0906716	0.127244	0.058049
403	0.288476	0.16909	0.22011	0.117766	0.180863	0.10865
404	0.088908	0.0716011	0.068477	0.0435513	0.0371052	0.0386
405	0.0572208	0.038674	0.0376205	0.0247112	0.0219386	0.0227422
406	0.0373523	0.0420081	0.0284128	0.0342994	0.0247447	0.0267302
407	0.0300606	0.0669641	0.0321247	0.0663912	0.0176991	0.0433538
408	0.0619732	0.102197	0.0503899	0.0820767	0.0416853	0.0642605
409	0.0553526	0.0456005	0.0475965	0.0348643	0.0167281	0.0189363
410	0.0623654	0.0605456	0.0447186	0.0440701	0.0545162	0.0296123
411	0	0	0	0	0.00330611	0.00809827
412	0	0	0	0	0	0
413	0	0	0	0	0	0
414	0	0	0	0	0	0
415	0.32056	0.125851	0.222026	0.12129	0.169581	0.125206
416	0.620322	0.112451	0.540549	0.0839558	0.30281	0.10624
417	0.755102	0.147608	0.638817	0.126495	0.40286	0.148301
418	0.767017	0.148477	0.709441	0.0915758	0.536879	0.1863
419	0.115379	0.0912933	0.0912579	0.0717869	0.0615291	0.0593012
420	0.0117482	0.0160639	0.00701857	0.009716	0.00541328	0.0132598
421	0.0232862	0.0288311	0.0133881	0.0175728	0.00582969	0.0142798
422	0.0132308	0.0295131	0.014017	0.0278773	0.0106546	0.0176124
423	0.177265	0.152932	0.133377	0.10664	0.0429715	0.0602036
424	0.89896	0.117274	0.713694	0.192685	0.442959	0.170823
425	0	0	0	0	0	0
426	0	0	0	0	0	0
427	0	0	0	0	0	0
428	0	0	0	0	0	0
429	0.899649	0.140702	0.666012	0.0852625	0.373243	0.148196
430	0.938808	0.130267	0.660237	0.0948513	0.37356	0.137228
431	0.722419	0.103727	0.517845	0.0702118	0.297181	0.105842
432	0.674556	0.155407	0.457757	0.0981939	0.306741	0.115563
433	0	0	0	0	0	0
434	0	0	0	0	0	0
435	0	0	0	0	0	0
436	0.0210368	0.0379358	0.0398527	0.0424475	0.0614417	0.075951
437	0.106697	0.117242	0.041569	0.0524925	0.0539896	0.0667835
438	0	0	0	0	0	0
439	0	0	0	0	0	0
440	0.0816334	0.0803782	0.0381875	0.0427242	0.0154675	0.0207235
441	0.501877	0.133547	0.306654	0.15283	0.22221	0.115174
442	0.492128	0.154662	0.334381	0.107658	0.290612	0.122716
443	0.188482	0.122624	0.221094	0.0834207	0.359702	0.191636
444	0.314612	0.247747	0.121974	0.117193	0.197901	0.136202
445	0.492576	0.150916	0.268647	0.148236	0.127221	0.096419
446	0.791973	0.207719	0.64321	0.160693	0.432482	0.138397
447	0.763082	0.220005	0.957121	0.197576	1.18323	0.200806
448	0.785055	0.202692	1.70728	0.242252	1.69898	0.433856
449	0	0	0	0	0	0
450	0.402522	0.165473	0.756123	0.15568	0.650586	0.412891
451	0.453611	0.174353	0.39725	0.140059	0.29702	0.15254
452	0.77728	0.182076	0.753405	0.206175	0.786936	0.132635
453	0	0	0	0	0	0
454	1.05477	0.326379	0.827185	0.138958	0.715824	0.180209
455	0.981244	0.286542	0.766529	0.104598	0.497922	0.201352
456	0.967397	0.258453	0.73899	0.125754	0.517652	0.161471
457	0.359463	0.0940805	0.259007	0.097623	0.147793	0.0436442
458	0.224303	0.100321	0.153678	0.0718663	0.185406	0.115772
459	0.0892463	0.0766153	0.0913526	0.0826541	0.285174	0.223651
460	0.141014	0.154192	0.0916101	0.17275	0.276165	0.24975
461	0.0318665	0.0548813	0.00170053	0.00510158	0.0379091	0.0589913
462	0	0	0	0	0	0
